# Supplementary figures and images for: TLR4 Modulates Senescence and Paracrine Action in Placental Mesenchymal Stem Cells via Inhibiting Hedgehog Signaling Pathway in Preeclampsia
Source: Hindawi journal article supplement (doi:10.1155/2022/7202837), 2022-01-01

**a**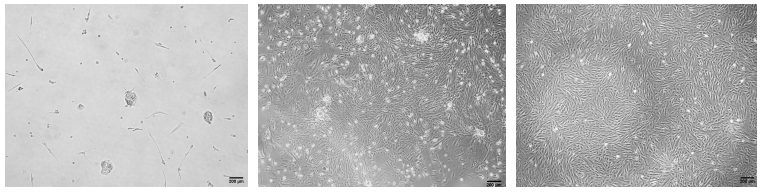**b**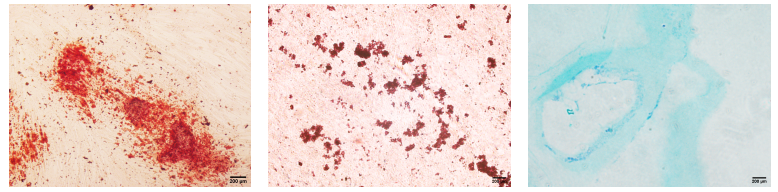**c**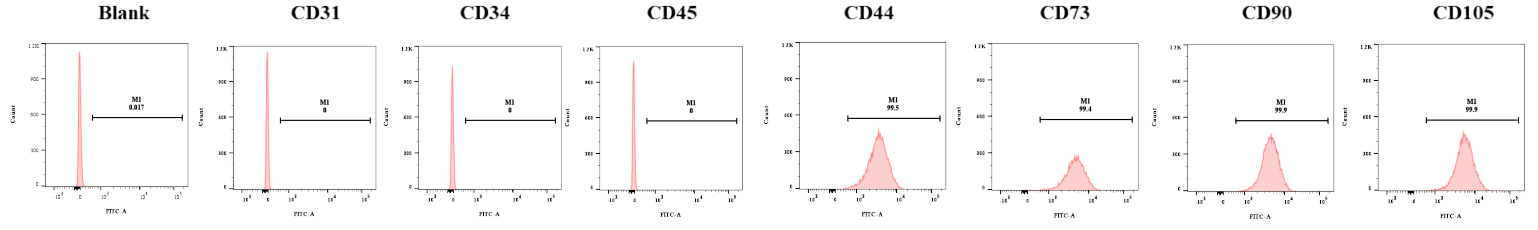

Supplement: f1 [file 7202837.f1.pdf]

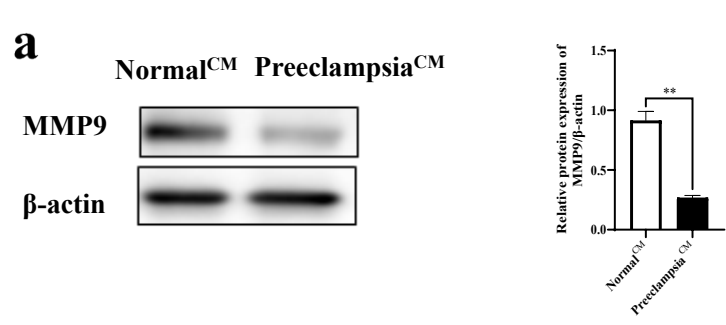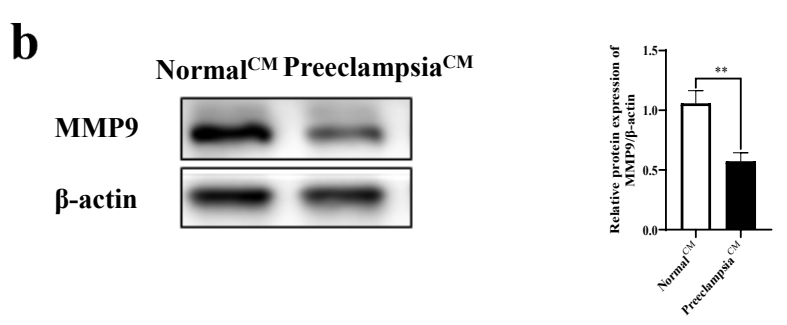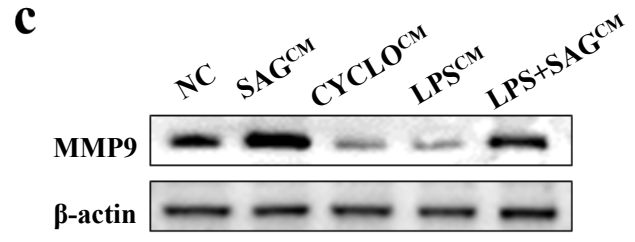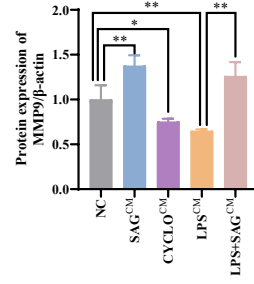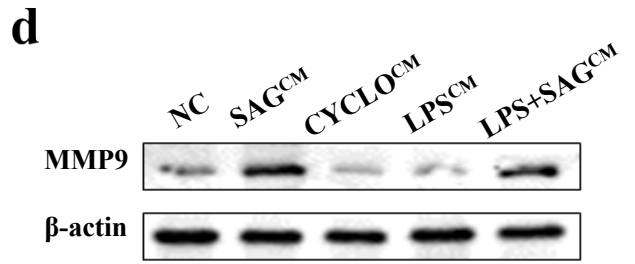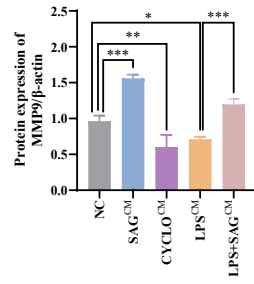

Supplement: f2 [file 7202837.f2.pdf]

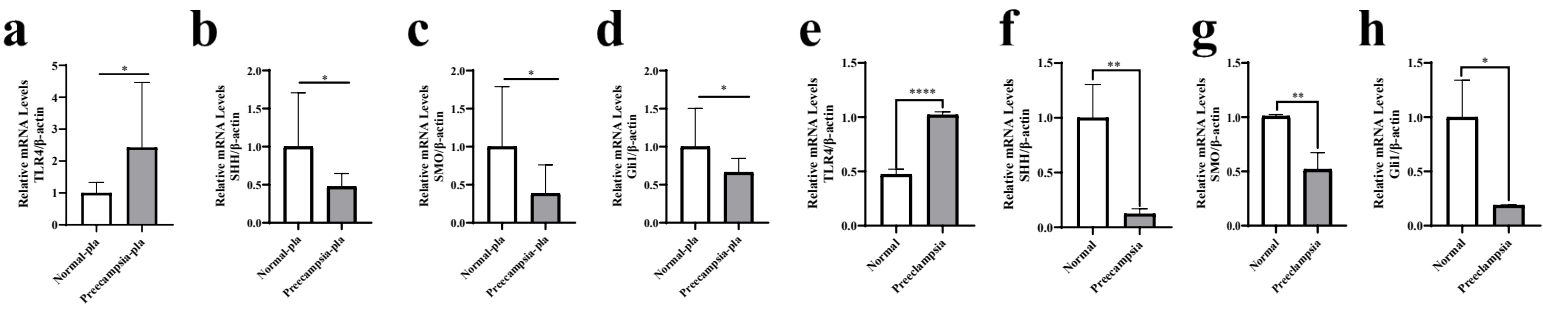

Supplement: f3 [file 7202837.f3.pdf]
